# Supplementary material for: miRISC and the CCR4–NOT complex silence mRNA targets independently of 43S ribosomal scanning
Source: PubMed Central journal article supplement — EMBO J. 2016 Mar 24;35(11):1186–203. doi: 10.15252/embj.201592901 (PMC4888236; doi:10.15252/embj.201592901), 2016-03-24
Supplement: EMBJ-35-1186-s001.pdf [file EMBJ-35-1186-s001.pdf]

## **Appendix**

### **miRISC and the CCR4-NOT complex silence mRNA targets independently of 43S ribosomal scanning**

Duygu Kuzuoğlu-Öztürk, Dipankar Bhandari, Eric Huntzinger, Maria Fauser, Sigrun  
Helms and Elisa Izaurralde

**Table of contents**

**Appendix Figure S1**

**Appendix Figure S2**

**Appendix Table S1**

**Appendix Table S2**

**Appendix Table S3**

**Appendix Table S4**

**Appendix Methods**

**Appendix References**

# Appendix Figure S1

## A Hs AGO2

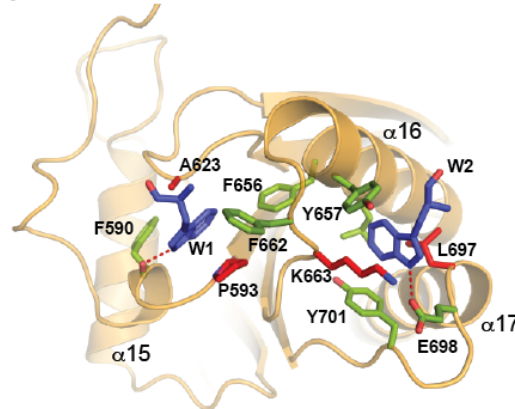

## B

|                 |     |                |               |                   |                  |               |               |           |               |              |            |     |
|-----------------|-----|----------------|---------------|-------------------|------------------|---------------|---------------|-----------|---------------|--------------|------------|-----|
| <i>Hs AGO2</i>  |     | 580            | 590           | 600               | 610              | 620           | 630           |           |               |              |            |     |
| <i>Hs AGO2</i>  | 577 | VNNILLPQGRPPVF | QQPVIFLGA     | VTHPPAGDGKK       | .....            | PSIAAVVGSMDA  | AHPNRYCATVRVQ | 635       |               |              |            |     |
| <i>Hs AGO1</i>  | 572 | INNILVPHQRSVAV | QQPVIFLGA     | VTHPPAGDGKK       | .....            | PSITAVVGSMDA  | HPNRYCATVRVQ  | 630       |               |              |            |     |
| <i>Hs AGO3</i>  | 575 | INNILVPHQRSVAV | QQPVIFLGA     | VTHPPAGDGKK       | .....            | PSIAAVVGSMDA  | HPNRYCATVRVQ  | 633       |               |              |            |     |
| <i>Hs AGO4</i>  | 566 | INNVLVPHQRSVAV | QQPVIFLGA     | VTHPPAGDGKK       | .....            | PSIAAVVGSMDG  | HPNRYCATVRVQ  | 624       |               |              |            |     |
| <i>Dm AGO1</i>  | 698 | INSILVPSIRPKV  | ENPVIFLGA     | VTHPPAGDNKK       | .....            | PSIAAVVGSMDA  | HPNRYAATVRVQ  | 756       |               |              |            |     |
| <i>Dm AGO2</i>  | 943 | INHAIKDDPRL    | .PMMKNTMYIGA  | VTHPPSPDQREI      | .....            | PSVVGVAASHDP  | YGASYNMQYRLQ  | 1000      |               |              |            |     |
| <i>Nc QDE2</i>  | 642 | TNHNK          | .TPIPLLAKGKTM | VVGVYVTHPTNLAAGQ  | SPASAPSIVGLVSTID | QHLGQWPAMVWNN |               | 704       |               |              |            |     |
| <i>Sp AGO1</i>  | 558 | INCSLIPKS      | .NPLGNVTL     | LLGGVYVYHPPGVGATG | V.....           | SIASIVASVDL   | NGCKYTAVSRSQ  | 614       |               |              |            |     |
| <i>Hs PIWI1</i> | 615 | ELWRVD         | .....         | IPLKLVMI          | LVGIC            | CYHDMTAGRRS   | .....         | IAGFVASIN | EGMTRWFSRCIFQ | 665          |            |     |
| <i>Hs PIWI2</i> | 728 | ELWQVD         | .....         | IPLKQLM           | VIGM             | VYHDPVSRGMRS  | .....         | VVGFVASIN | LTLLTKWYSRVVQ | 778          |            |     |
| <i>Hs PIWI3</i> | 637 | ALWKVE         | .....         | TDVQR             | TMFVGI           | CFHDI         | VNRQKS        | .....     | IAGFVASTN     | ELTKWYSQCVIQ | 687        |     |
| <i>Hs PIWI4</i> | 606 | ELWAVE         | .....         | IPLKSLM           | VVGI             | VCKDAL        | SKDVM         | .....     | VVGCVASV      | NPRI         | TRWFSRCILQ | 656 |

  

|                 |      |      |      |       |              |        |         |        |       |        |       |        |      |         |        |        |         |         |         |     |
|-----------------|------|------|------|-------|--------------|--------|---------|--------|-------|--------|-------|--------|------|---------|--------|--------|---------|---------|---------|-----|
| <i>Hs AGO2</i>  |      | 640  | 650  | 660   | 670          | 680    |         |        |       |        |       |        |      |         |        |        |         |         |         |     |
| <i>Hs AGO2</i>  | 636  | QHRQ | RI   | ..... | IQDLAAMVRELL | LIQFYK | .....   | T.RFKP | TRIF  | YR     | D     | GVSEGG | FQ   | QVLHHE  | 686    |        |         |         |         |     |
| <i>Hs AGO1</i>  | 631  | RPRQ | RI   | ..... | IEDLSYMVRELL | LIQFYK | .....   | T.RFKP | TRIF  | YR     | D     | GVPEGG | LF   | QILHYE  | 681    |        |         |         |         |     |
| <i>Hs AGO3</i>  | 634  | RPRQ | RI   | ..... | IQDLASMVRELL | LIQFYK | .....   | T.RFKP | TRIF  | YR     | D     | GVSEGG | FR   | QVLYYE  | 684    |        |         |         |         |     |
| <i>Hs AGO4</i>  | 625  | TSRQ | EISQ | ELLYS | QEV          | IQDLT  | NMVRELL | LIQFYK | ..... | T.RFKP | TRII  | YR     | D    | GVSEGG  | MKQV   | AWPE   | 685     |         |         |     |
| <i>Dm AGO1</i>  | 757  | QHRQ | RI   | ..... | IQELSSMVRELL | LIQFYK | .....   | TGGY   | KPHRI | ILYR   | D     | GVSEGG | FP   | PHVLQHE | 808    |        |         |         |         |     |
| <i>Dm AGO2</i>  | 1001 | RGAL | EE   | ..... | IEDMFSI      | LEHL   | LRVY    | KEY    | ..... | R.NAYP | DHI   | YR     | D    | GVSDGG  | FP     | KIKNEE | 1051    |         |         |     |
| <i>Nc QDE2</i>  | 705  | PHQE | EV   | ..... | MTEQ         | FTDK   | PKTR    | LEL    | WR    | SNP    | ANNR  | SL     | PENI | LI      | FR     | D      | GVSEGG  | FQ      | MVIKDE  | 759 |
| <i>Sp AGO1</i>  | 615  | PRHQ | EV   | ..... | IEGMKDI      | VYLL   | QGF     | RAM    | ..... | T.KQQP | QRI   | YR     | D    | GVSEGG  | FL     | SVINDE | 665     |         |         |     |
| <i>Hs PIWI1</i> | 666  | DRGQ | EL   | ..... | VDGLK        | VCLQA  | ALRA    | WNSC   | ..... | N.EY   | MPS   | RI     | YR   | D       | GVSDGG | QL     | KTLVNYE | 716     |         |     |
| <i>Hs PIWI2</i> | 779  | MPHQ | I    | ..... | VDSLK        | LCLVGS | KK      | YEV    | ..... | N.HCL  | PEK   | I      | VYR  | D       | GVSDGG | QL     | KTLVNYE | 829     |         |     |
| <i>Hs PIWI3</i> | 688  | KTGE | EL   | ..... | VKELE        | ICLKA  | ALD     | VW     | CKN   | .....  | E.SS  | MPS    | H    | SVI     | YR     | D      | GVSDGG  | QL      | QALLDHE | 738 |
| <i>Hs PIWI4</i> | 657  | RTMT | DV   | ..... | ADCLK        | VFM    | TGAL    | NK     | WY    | .....  | N.HDL | PARI   | I    | VYR     | D      | GVSDGG | QL      | KTLEIYE | 707     |     |

  

|                 |      |        |        |       |            |      |        |     |     |      |      |     |      |      |    |      |       |     |        |      |     |    |       |    |    |       |       |    |    |       |     |   |   |   |   |   |   |   |   |   |     |     |   |    |     |     |   |   |   |   |     |   |   |     |
|-----------------|------|--------|--------|-------|------------|------|--------|-----|-----|------|------|-----|------|------|----|------|-------|-----|--------|------|-----|----|-------|----|----|-------|-------|----|----|-------|-----|---|---|---|---|---|---|---|---|---|-----|-----|---|----|-----|-----|---|---|---|---|-----|---|---|-----|
| <i>Hs AGO2</i>  |      | 690    | 700    | 710   | 720        | 730  | 740    |     |     |      |      |     |      |      |    |      |       |     |        |      |     |    |       |    |    |       |       |    |    |       |     |   |   |   |   |   |   |   |   |   |     |     |   |    |     |     |   |   |   |   |     |   |   |     |
| <i>Hs AGO2</i>  | 687  | LLAIRE | ACIKLE | KDYQ  | .PGITFIVVQ | KRRH | TRFL   | CF  | TDK | NERV | GKSG | NI  | PAGT | TV   | DT | KITH | PTEF  | 749 |        |      |     |    |       |    |    |       |       |    |    |       |     |   |   |   |   |   |   |   |   |   |     |     |   |    |     |     |   |   |   |   |     |   |   |     |
| <i>Hs AGO1</i>  | 682  | LLAIRD | ACIKLE | KDYQ  | .PGITFIVVQ | KRRH | TRFL   | CF  | ADK | NERI | GKSG | NI  | PAGT | TV   | DT | NIT  | HPPEF | 744 |        |      |     |    |       |    |    |       |       |    |    |       |     |   |   |   |   |   |   |   |   |   |     |     |   |    |     |     |   |   |   |   |     |   |   |     |
| <i>Hs AGO3</i>  | 685  | LLAIRE | ACISLE | KDYQ  | .PGITFIVVQ | KRRH | TRFL   | CF  | ADR | TERV | GRSG | NI  | PAGT | TV   | DT | IT   | HPPEF | 747 |        |      |     |    |       |    |    |       |       |    |    |       |     |   |   |   |   |   |   |   |   |   |     |     |   |    |     |     |   |   |   |   |     |   |   |     |
| <i>Hs AGO4</i>  | 686  | LIAIRK | ACISLE | EEDYR | .PGITFIVVQ | KRRH | TRFL   | CF  | ADK | TERV | GKSG | NI  | PAGT | TV   | DS | TI   | HPSEF | 748 |        |      |     |    |       |    |    |       |       |    |    |       |     |   |   |   |   |   |   |   |   |   |     |     |   |    |     |     |   |   |   |   |     |   |   |     |
| <i>Dm AGO1</i>  | 809  | LTAIRE | ACIKLE | PEYR  | .PGITFIVVQ | KRRH | TRFL   | CF  | AEK | EQS  | GKSG | NI  | PAGT | TV   | DV | IT   | HPTEF | 871 |        |      |     |    |       |    |    |       |       |    |    |       |     |   |   |   |   |   |   |   |   |   |     |     |   |    |     |     |   |   |   |   |     |   |   |     |
| <i>Dm AGO2</i>  | 1052 | LRCIK  | QACDKV | G.CK  | .PKICCVI   | VV   | KRRH   | TR  | FP  | SGD  | V    | TSN | KFN  | ND   | PG | T    | V     | DR  | IVHPNE | 1112 |     |    |       |    |    |       |       |    |    |       |     |   |   |   |   |   |   |   |   |   |     |     |   |    |     |     |   |   |   |   |     |   |   |     |
| <i>Nc QDE2</i>  | 760  | LP     | L      | VRA   | AA         | CKLV | PAG    | KLP | RI  | TL   | IV   | SV  | KRH  | T    | RF | FP   | TD    | PK  | H      | IF   | FKS | K  | SP    | KE | GT | V     | DR    | GV | TN | RYW   | 823 |   |   |   |   |   |   |   |   |   |     |     |   |    |     |     |   |   |   |   |     |   |   |     |
| <i>Sp AGO1</i>  | 666  | LSQI   | KEA    | CHS   | LSP        | KYN  | .PKILV | CTQ | KRH | H    | AR   | FF  | I    | KN   | KS | .GDR | NG    | N   | PL     | PG   | T   | I  | E     | K  | H  | V     | T     | HP | YQ | 727   |     |   |   |   |   |   |   |   |   |   |     |     |   |    |     |     |   |   |   |   |     |   |   |     |
| <i>Hs PIWI1</i> | 717  | VP     | Q      | FL    | D          | CL   | KS     | I   | GR  | YN   | .PRL | T   | V    | V    | V  | K    | R     | V   | N      | T    | R   | FF | ..... | AQ | SG | GR    | L     | Q  | N  | P     | L   | P | G | T | V | I | D | V | T | R | PEW | 775 |   |    |     |     |   |   |   |   |     |   |   |     |
| <i>Hs PIWI2</i> | 830  | IP     | Q      | L     | Q          | K    | .CFE   | A   | F   | E    | N    | Y   | Q    | .PKM | V  | F    | V     | V   | Q      | K    | I   | S  | T     | N  | LY | ..... | LA    | A  | P  | Q     | N   | F | V | T | P | T | P | G | T | V | D   | H   | T | IS | CEW | 887 |   |   |   |   |     |   |   |     |
| <i>Hs PIWI3</i> | 739  | AK     | M      | S     | T          | .YL  | K      | T   | I   | S    | P    | N   | .F   | L    | A  | F    | I     | V   | V      | K    | R   | I  | N     | T  | R  | FF    | ..... | L  | K  | H     | S   | N | F | Q | N | P | P | G | T | V | I   | D   | V | E  | L   | T   | R | N | E | W | 796 |   |   |     |
| <i>Hs PIWI4</i> | 708  | VP     | Q      | L     | L          | S    | V      | A   | E   | S    | S    | N   | T    | S    | .S | R    | L     | S   | V      | I    | V   | R  | K     | K  | C  | M     | P     | R  | F  | ..... | T   | E | M | N | R | T | V | Q | N | P | L   | G   | T | V  | D   | S   | E | A | T | R | N   | E | W | 766 |

  

|                 |      |       |       |     |     |     |     |   |   |   |       |   |   |   |   |   |   |   |   |   |   |   |   |       |       |       |   |   |   |   |   |   |   |   |   |   |   |   |   |   |   |   |   |     |     |   |   |   |   |   |   |   |   |     |   |      |     |     |     |   |   |   |   |     |
|-----------------|------|-------|-------|-----|-----|-----|-----|---|---|---|-------|---|---|---|---|---|---|---|---|---|---|---|---|-------|-------|-------|---|---|---|---|---|---|---|---|---|---|---|---|---|---|---|---|---|-----|-----|---|---|---|---|---|---|---|---|-----|---|------|-----|-----|-----|---|---|---|---|-----|
| <i>Hs AGO2</i>  |      | 750   | 760   | 770 | 780 | 790 | 800 |   |   |   |       |   |   |   |   |   |   |   |   |   |   |   |   |       |       |       |   |   |   |   |   |   |   |   |   |   |   |   |   |   |   |   |   |     |     |   |   |   |   |   |   |   |   |     |   |      |     |     |     |   |   |   |   |     |
| <i>Hs AGO2</i>  | 750  | DFYLC | SHAGI | QGT | SRP | SHY | V   | L | W | D | ..... | N | R | F | S | S | D | E | L | Q | I | L | T | Y     | Q     | L     | C | H | T | Y | V | R | C | T | R | S | V | S | I | P | A | P | A | Y   | 807 |   |   |   |   |   |   |   |   |     |   |      |     |     |     |   |   |   |   |     |
| <i>Hs AGO1</i>  | 745  | DFYLC | SHAGI | QGT | SRP | SHY | V   | L | W | D | ..... | N | R | F | T | A | D | E | L | Q | I | L | T | Y     | Q     | L     | C | H | T | Y | V | R | C | T | R | S | V | S | I | P | A | P | A | Y   | 802 |   |   |   |   |   |   |   |   |     |   |      |     |     |     |   |   |   |   |     |
| <i>Hs AGO3</i>  | 748  | DFYLC | SHAGI | QGT | SRP | SHY | V   | L | W | D | ..... | N | C | F | T | A | D | E | L | Q | L | L | T | Y     | Q     | L     | C | H | T | Y | V | R | C | T | R | S | V | S | I | P | A | P | A | Y   | 805 |   |   |   |   |   |   |   |   |     |   |      |     |     |     |   |   |   |   |     |
| <i>Hs AGO4</i>  | 749  | DFYLC | SHAGI | QGT | SRP | SHY | V   | L | W | D | ..... | N | C | F | T | A | D | E | L | Q | L | L | T | Y     | Q     | L     | C | H | T | Y | V | R | C | T | R | S | V | S | I | P | A | P | A | Y   | 806 |   |   |   |   |   |   |   |   |     |   |      |     |     |     |   |   |   |   |     |
| <i>Dm AGO1</i>  | 872  | DFYLC | SHQI  | QGT | SRP | SHY | V   | L | W | D | ..... | N | H | F | S | D | E | L | Q | C | L | T | Y | Q     | L     | C     | R | T | Y | V | R | C | T | R | S | V | S | I | P | A | P | A | Y | 929 |     |   |   |   |   |   |   |   |   |     |   |      |     |     |     |   |   |   |   |     |
| <i>Dm AGO2</i>  | 1113 | Q     | P     | F   | M   | V   | S   | H | Q | A | I     | O | G | T | A | K | P | T | R | N | V | I | E | ..... | G     | N     | L | D | I | D | L | L | Q | L | T | Y | N | L | C | H | M | F | P | R   | C   | N | R | S | V | S | P | A | P | A   | Y | 1170 |     |     |     |   |   |   |   |     |
| <i>Nc QDE2</i>  | 824  | D     | F     | F   | L   | Q   | A   | H | A | S | L     | O | G | T | A | R | S | A | H | T | V | L | V | D     | E     | I     | F | R | A | D | Y | G | N | K | A | A | D | T | L | E | Q | L | T | H   | D   | M | C | Y | L | F | R | A | T | K   | A | V    | S   | I   | C   | P | P | A | Y | 887 |
| <i>Sp AGO1</i>  | 728  | D     | F     | Y   | L   | I   | S   | H | P | S | L     | Q | G | V | S | V | P | H | T | V | L | H | D | ..... | I     | Q     | M | P | D | Q | F | T | L | C | Y | N | L | C | Y | A | R | A | T | S   | A   | V | S | L | V | P | P | V | Y | 785 |   |      |     |     |     |   |   |   |   |     |
| <i>Hs PIWI1</i> | 776  | D     | F     | F   | I   | V   | S   | Q | A | V | R     | S | G | S | V | S | P | T | H | Y | N | V | I | D     | ..... | S     | G | L | K | P | D | H | I | Q | R | L | T | Y | K | L | C | H | I | Y   | N   | W | P | G | V | I | R | V | P | A   | P | C    | Q   | 833 |     |   |   |   |   |     |
| <i>Hs PIWI2</i> | 888  | D     | F     | Y   | L   | L   | A   | H | V | R | Q     | G | C | G | I | P | T | H | Y | V | C | V | L | N     | T     | ..... | A | N | L | S | P | D | H | M | Q | R | L | T | F | K | L | C | H | M   | Y   | N | W | P | G | T | I | R | V | P   | A | P    | C   | Q   | 945 |   |   |   |   |     |
| <i>Hs PIWI3</i> | 797  | D     | F     | F   | I   | V   | S   | Q | S | V | Q     | D | E | T | V | T | P | T | H | Y | N | V | I | D     | ..... | I     | G | L | S | P | D | T | V | Q | R | L | T | Y | C | L | H | M | Y | N   | L   | P | G | I | R | V | P | A | P | C   | H | 854  |     |     |     |   |   |   |   |     |
| <i>Hs PIWI4</i> | 767  | D     | F     | Y   | L   | I   | S   | Q | V | A | C     | R | G | T | V | S | P | T | Y | N | V | I | D | ..... | N     | G     | L | K | P | D | H | M | Q | R | L | T | F | K | L | C | H | L | Y | N   | W   | P | G | I | V | S | V | P | A | P   | C | Q    | 824 |     |     |   |   |   |   |     |

  

|                |     |     |     |     |     |     |     |   |   |   |   |   |   |   |   |   |   |   |   |   |   |   |   |   |   |   |   |   |   |   |   |   |   |   |   |   |   |   |   |   |   |   |   |   |   |   |   |   |   |   |   |   |   |   |   |     |
|----------------|-----|-----|-----|-----|-----|-----|-----|---|---|---|---|---|---|---|---|---|---|---|---|---|---|---|---|---|---|---|---|---|---|---|---|---|---|---|---|---|---|---|---|---|---|---|---|---|---|---|---|---|---|---|---|---|---|---|---|-----|
| <i>Hs AGO2</i> |     | 810 | 820 | 830 | 840 | 850 | 860 |   |   |   |   |   |   |   |   |   |   |   |   |   |   |   |   |   |   |   |   |   |   |   |   |   |   |   |   |   |   |   |   |   |   |   |   |   |   |   |   |   |   |   |   |   |   |   |   |     |
| <i>Hs AGO2</i> | 808 | Y   | A   | L   | V   | A   | F   | R | A | R | Y | H | L | V | D | K | E | H | D | S | A | E | G | S | H | T | S | G | Q | S | N | G | R | D | H | Q | A | L | A | K | A | V | Q | V | H | Q | D | T | L | R | T | M | Y | F | A | 862 |
| <i>Hs AGO1</i> | 803 | Y   | A   | L   | V   | A   | F   | R | A | R | Y | H | L | V | D | K | E | H | D | S | G | E | G | S | H | I | S | G | Q | S | N | G | R | D | P | Q | A | L | A | K | A | V | Q | V | H | Q | D | T | L | R | T | M | Y | F | A | 857 |
| <i>Hs AGO3</i> | 806 | Y   | A   | L   | V   | A   | F   | R | A | R | Y | H | L | V | D | K | E | H | D | S | A | E | G | S | H | V | S | G | Q | S | N | G | R | D | P | Q | A | L | A | K | A | V | Q | V | H | Q | D | T | L | R | T | M | Y | F | A | 860 |
| <i>Hs AGO4</i> | 807 | Y   | A   | L   | V   | A   | F   | R | A | R | Y | H | L | V | D | K | D | H | D | S | A | E | G | S | H | V | S | G |   |   |   |   |   |   |   |   |   |   |   |   |   |   |   |   |   |   |   |   |   |   |   |   |   |   |   |     |

**Figure S1. The W-binding pockets are conserved in the AGO proteins that interact with GW182/TNRC6 proteins.**

- A Ribbon representation of *Hs* AGO2 (PDB ID: 4OLB) showing the position of the tryptophan-binding pockets. Residues lining the pockets are shown as green sticks or as red sticks when the residues were mutated. The tryptophan residues are shown as blue sticks.
- B Structure-based sequence alignment of the PIWI domain of human AGO1, AGO2, AGO3 and AGO4, *Drosophila melanogaster* (*Dm*) AGO1 and AGO2, *Neurospora crassa* (*Nc*) QDE2, *Schizosaccharomyces pombe* (*Sp*) AGO1 and the human PIWI-like clade. Residues lining the tryptophan-binding pockets 1 and 2 are shaded in green and orange, respectively. Residues forming the catalytic tetrad are highlighted in red. Residues mutated in this study are marked with a red asterisk. Residues lining the W-binding pockets are conserved in *Hs* AGO1, AGO3 and AGO4 as well as in *Dm* AGO1, which is the AGO protein dedicated to the miRNA pathway in *Dm* (Okamura *et al*, 2004; Schirle & MacRae, 2012). By contrast, these residues are less conserved in the PIWI clade of Argonaute proteins and in *Dm* AGO2, which do not interact with GW182 (Behm-Ansmant *et al*, 2006; Miyoshi *et al*, 2009). To abolish the interaction of *Hs* AGO2 and *Dm* AGO1 with GW182 proteins, we substituted a proline residue in pocket 1 with glycine to prevent hydrophobic stacking interactions with tryptophan residues and an alanine with a bulky phenylalanine to block tryptophan binding (mutant P1). In pocket P2, we substituted a leucine residue with a bulky tyrosine to block the pocket and a lysine residue with alanine to prevent hydrophobic stacking interactions (mutant P2).

## Appendix Figure S2

### A *Hs* TISU-R-Luc-6xMS2-A<sub>95</sub>-MALAT1

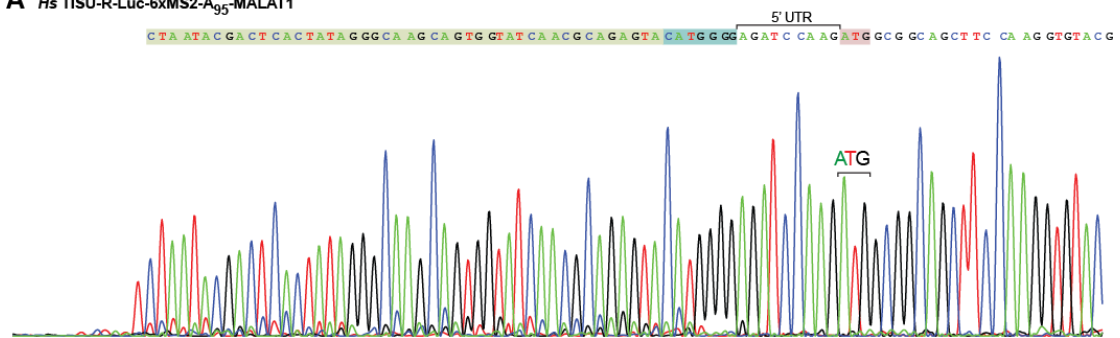

### B *Hs* TISU-R-Luc-6xMS2-poly(A)

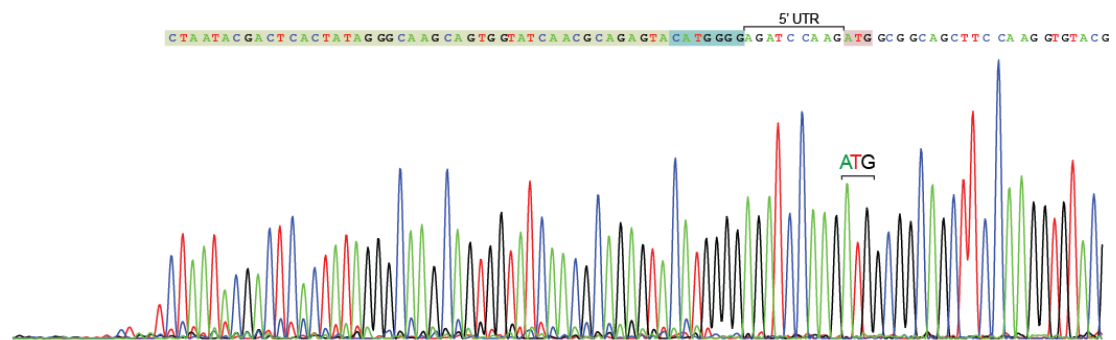

### C *Hs* TISU-R-Luc-8xlet7-poly(A)

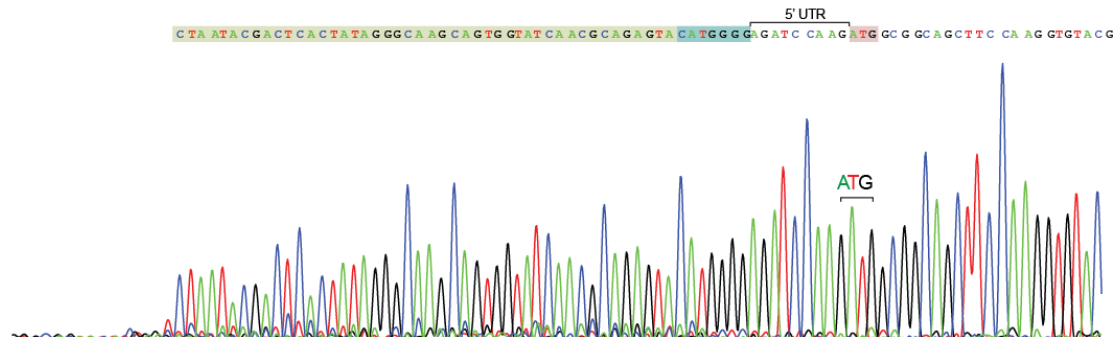

**Figure S2. Partial sequencing chromatograms of 5'-RACE amplified cDNA fragments for the indicated reporters.**

### Appendix Figure S3

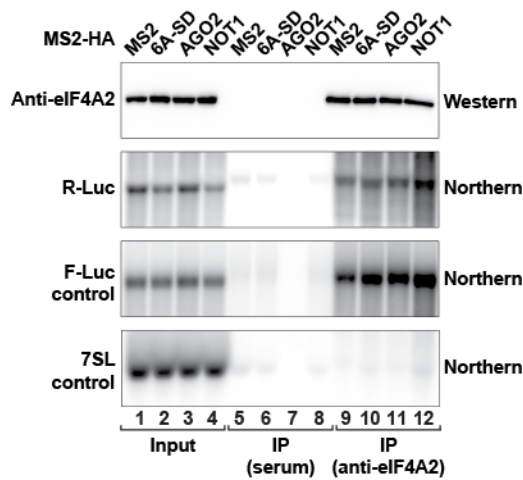

**Figure S3. eIF4A2 binding to mRNAs is not influenced by silencing.**

Lysates from HEK293T cells expressing R-Luc-MS2-A<sub>95</sub>-MALAT1 reporter and the indicated MS2-HA tagged proteins were immunoprecipitated using anti-eIF4A2 antibody as described in Fig 4F–H. The RNAs coimmunoprecipitating with eIF4A2 were analyzed by northern blot. The panel shows a representative western and northern blots of input and IP fractions. For the western blot, 2% of the input and 6% of the IP fraction were analyzed. For the northern blots 2% of the input and 40% of the IP were analyzed.

**Appendix Table S1. Mutants used in this study.**

| <b>Protein</b>                 | <b>Name of the construct</b> | <b>Mutations</b>                                                                     |
|--------------------------------|------------------------------|--------------------------------------------------------------------------------------|
| <i>Dm</i> AGO1<br>NM_166020.1  | P1                           | P714G + A744F                                                                        |
|                                | P2                           | L819Y                                                                                |
|                                | P1+2                         | P714G + A744F + L819Y                                                                |
| <i>Hs</i> AGO2                 | P1                           | P593A + A623F                                                                        |
|                                | P2                           | L697Y + K663A                                                                        |
|                                | P1+2                         | P593A + A623F + L697Y + K663A                                                        |
| <i>Dm</i> DCP1<br>NM_137998.2  | DCP1* (GSSG)                 | R70G + L71S + N72S + T73G                                                            |
| <i>Hs</i> DCP2<br>AY135173.1   | DCP2*                        | E148Q                                                                                |
| <i>Hs</i> NOT1<br>EF553522.1   | NOT1 Mut                     | F1101S + N1105A + K1114A +<br>R1138A + N1144A + F1145A +<br>K1276A + F1281A + E1284A |
| <i>Hs</i> DDX6<br>NM_004397.3  | DDX6 E236Q                   | E236Q                                                                                |
|                                | DDX6 Mut1                    | R94E + F101D + Q322A + N324A<br>+ R375A                                              |
|                                | DDX6 Mut2                    | Q209A + H312A + T316A +<br>R320A + R335A + K341A +<br>K342A                          |
| <i>Hs</i> TNRC6A<br>AY035864.1 | TNRC6A-SD                    | Residues 1272 – 1709                                                                 |

**Appendix Table S2. Reporters used in this study.**

| <b>Organism</b>                                                         | <b>Name of the Reporter</b>                                   | <b>Vector</b>       |
|-------------------------------------------------------------------------|---------------------------------------------------------------|---------------------|
| <i>Dm</i>                                                               | F-Luc-5BoxB-poly(A)                                           | pAc5.1C             |
|                                                                         | F-Luc-5BoxB-A <sub>95</sub> -C <sub>7</sub> -HhR              | pAc5.1C             |
|                                                                         | F-Luc-A <sub>95</sub> -C <sub>7</sub> -HhR                    | pAc5.1C             |
|                                                                         | F-Luc-V5-5BoxB-A <sub>95</sub> -C <sub>7</sub> -HhR           | pAc5.1C             |
|                                                                         | 8nt-F-Luc-5BoxB-A <sub>95</sub> - C <sub>7</sub> -HhR         | pAc5.1C             |
|                                                                         | 8nt-F-Luc-V5-5BoxB-A <sub>95</sub> - C <sub>7</sub> -HhR      | pAc5.1C             |
|                                                                         | 8nt-F-Luc-5BoxB-poly(A)                                       | pAc5.1C             |
|                                                                         | F-Luc-poly(A)                                                 | pAc5.1C             |
|                                                                         | F-Luc- <i>par6</i> -poly(A)                                   | pAc5.1C             |
|                                                                         | 8nt-F-Luc- <i>par6</i> -poly(A)                               | pAc5.1C             |
|                                                                         | R-Luc- A <sub>95</sub> -HhR                                   | pAc5.1C             |
|                                                                         | F-Luc- <i>Nerfin-1</i> -poly(A)                               | pAc5.1C             |
|                                                                         | 8nt-F-Luc- <i>Nerfin-1</i> -poly(A)                           | pAc5.1C             |
|                                                                         | F-Luc- <i>cg5281</i> -poly(A)                                 | pAc5.1C             |
|                                                                         | HA-GST                                                        | pAc5.1C             |
|                                                                         | 8nt-HA-GST                                                    | pAc5.1C             |
|                                                                         | F-Luc-Met <sub>31</sub> -5BoxB-poly(A)                        | pAc5.1C             |
|                                                                         | F-Luc(Leu)-V5-5BoxB-A <sub>95</sub> -C <sub>7</sub> -HhR*     | pAc5.1C             |
|                                                                         | 8nt-F-Luc(Leu)-V5-5BoxB-A <sub>95</sub> -C <sub>7</sub> -HhR* | pAc5.1C             |
|                                                                         | <i>Hs</i>                                                     | R-Luc-5BoxB-poly(A) |
| R-Luc-5BoxB-A <sub>95</sub> -MALAT1                                     |                                                               | pCI-neo             |
| R-Luc-poly(A)                                                           |                                                               | pCI-neo             |
| R-Luc-6xMS2                                                             |                                                               | pCI-neo             |
| R-Luc-6xMS2-A <sub>95</sub> -MALAT1                                     |                                                               | pCI-neo             |
| R-Luc-A <sub>95</sub> -MALAT1                                           |                                                               | pCI-neo             |
| TISU-R-Luc-6xMS2- A <sub>95</sub> -MALAT1                               |                                                               | pCI-neo             |
| TISU-HA-R-Luc-6xMS2-MALAT1                                              |                                                               | pCI-neo             |
| TISU-R-Luc-6xMS2-poly(A)                                                |                                                               | pCI-neo             |
| CAA-R-Luc-6xMS2-A <sub>95</sub> - MALAT1                                |                                                               | pCI-neo             |
| CGG-R-Luc-6xMS2bs-A <sub>95</sub> - MALAT1                              |                                                               | pCI-neo             |
| β-Globin-GAPDH (Control)                                                |                                                               | pcDNA3.1            |
| β-Globin-6xMS2-poly(A)                                                  |                                                               | pcDNA3.1            |
| F-Luc                                                                   |                                                               | pEGFP-N3            |
| EGFP-HCV-F-Luc                                                          |                                                               | pT7                 |
| R-Luc-8x <i>let7</i> -poly(A)                                           |                                                               | pCI-neo             |
| R-Luc-Mut ( <i>let7</i> -binding sites mutated)                         |                                                               | pCI-neo             |
| TISU-R-Luc-8x <i>let7</i> -poly(A)                                      |                                                               | pCI-neo             |
| TISU-R-Luc-Mut ( <i>let7</i> -binding sites mutated)                    |                                                               | pCI-neo             |
| R-Luc-8x <i>let7</i> -A <sub>95</sub> -MALAT1                           |                                                               | pCI-neo             |
| R-Luc-Mut-A <sub>95</sub> -MALAT1 ( <i>let7</i> -binding sites mutated) | pCI-neo                                                       |                     |

\* F-Luc(Leu)-V5 contains substitutions of all in-frame Met with Leu.

**Appendix Table S3. Sequence of 5'-UTRs used in this study.**

| <b>Organism</b> | <b>Reporter</b> | <b>Sequence</b>                                                                                                                                                                                                                                                |
|-----------------|-----------------|----------------------------------------------------------------------------------------------------------------------------------------------------------------------------------------------------------------------------------------------------------------|
| <i>Dm</i>       | 109nt-F-Luc     | auaucacuaccguuugaguucuuugugcuguguggauacuccuccgacacaa<br>agccgcuccaucagccagcagucgucuaauccagagacccccggaucggggua<br>ccaac <b><u>AUGGCC</u></b>                                                                                                                    |
|                 | 8nt-F-Luc       | auaucacu <b><u>AUGGCC</u></b> *                                                                                                                                                                                                                                |
| <i>Hs</i>       | 216nt-R-Luc     | agaucacuagaagcuuuauugcgguauguuuauacacaguuaaaauugcuaacgc<br>agucagugcuucugacacaacagucucgaacuuagcugcagugacucucuu<br>aagguagccuugcagaaguuggucgugaggcacugggcagguguccacucc<br>caguucaauuacagcucuuaggcuagaguacuuaauacgacucacuauagg<br>cuagccacc <b><u>AUGGCU</u></b> |
|                 | TISU-R-Luc      | agauccaag <b><u>AUG</u></b> gcggcaGCU*                                                                                                                                                                                                                         |
|                 | CAA-R-Luc       | agauccaacaacaacaacaacaacaacaacaacaacaacaacaacaaca<br>acaagccacc <b><u>AUGGCU</u></b>                                                                                                                                                                           |
|                 | CGG-R-Luc       | agauccuagguugaaaguacuuugacggcggcggcggcuauucuuacggcg<br>gcggcggacauagauacggcggcggcggcuagaaacuacggcggcggcggau<br>uagaauaguaaagccacc <b><u>AUGGCU</u></b>                                                                                                         |

The first AUG is indicated in bold and underlined. \*These 5'-UTRs were confirmed by 5'-RACE (Clontech), see Figs EV2A, EV3A and Appendix Fig S2.



**Appendix Table S4. Antibodies used in this study.**

| <b>Antibody</b>                                           | <b>Source</b>           | <b>Catalog Number</b> | <b>Dilution</b> | <b>Monoclonal/<br/>Polyclonal</b> |
|-----------------------------------------------------------|-------------------------|-----------------------|-----------------|-----------------------------------|
| Anti-HA-HRP<br>(For western blots)                        | Roche                   | 12013 819 001         | 1:5,000         | Monoclonal                        |
| Anti-HA (for immunoprecipitations and immunofluorescence) | Covance                 | MMS-101P              |                 | Mouse<br>Monoclonal               |
| Anti-GFP (for Western blotting)                           | Roche                   | 11 814 460 001        | 1:2,000         | Mouse<br>Monoclonal               |
| Anti-GFP (for immunoprecipitations)                       | In house                |                       |                 | Rabbit<br>polyclonal              |
| Anti-tubulin                                              | Sigma Aldrich           | T6199                 | 1:10,000        | Monoclonal                        |
| Anti-mouse IgG-HRP                                        | GE Healthcare           | NA931V                | 1:10,000        | Sheep<br>Polyclonal               |
| Anti-rabbit IgG-HRP                                       | GE Healthcare           | NA934V                | 1:10,000        | Donkey<br>Polyclonal              |
| Anti- <i>Hs</i> DDX6                                      | Bethyl Laboratories     | A300-461A             | 1:3,000         | Rabbit<br>polyclonal              |
| Anti- <i>Hs</i> PABP                                      | Abcam                   | ab21060               | 1:5,000         | Rabbit<br>polyclonal              |
| Anti- <i>Dm</i> GW182                                     | In house                |                       | 1:2,000         | Rabbit<br>polyclonal              |
| Anti- <i>Dm</i> NOT1                                      | Kind gift from E. Wahle |                       | 1:1,000         | Rabbit<br>polyclonal              |
| Anti- <i>Dm</i> AGO1                                      | Abcam                   | Ab5070                | 1:1,000         | Rabbit<br>polyclonal              |
| Anti- <i>Dm</i> Me31B                                     | In house                |                       | 1:3,000         | Rabbit<br>polyclonal              |
| Anti- <i>Hs</i> TNRC6A                                    | Bethyl Laboratories     | A302-329A             | 1:1000          | Rabbit<br>polyclonal              |
| Anti- <i>Hs</i> eIF4A2 (for immunoprecipitations)         | Abcam                   | Ab31218               |                 | Rabbit<br>polyclonal              |
| Anti- <i>Hs</i> eIF4A2 (for Western blotting)             | In house                |                       | 1:1,000         | Rabbit<br>polyclonal              |
| Anti- <i>Hs</i> NOT2                                      | Bethyl                  | A302-562A             | 1:2,000         | Rabbit<br>polyclonal              |
| Anti- <i>Hs</i> NOT3                                      | Abcam                   | Ab55681               | 1:2,000         | Rabbit<br>monoclonal              |
| Anti-V5                                                   | AbD Serotec             | MCA1360GA             | 1:5,000         | Mouse<br>Monoclonal               |
| Anti-4E-T                                                 | Bethyl                  | A300-706A             | 1:1,000         | Rabbit<br>polyclonal              |
| Alexa Fluor 594-labelled goat anti-mouse                  | Invitrogen              | A-11005               | 1:1,000         | Polyclonal                        |

## **Appendix Methods**

### **DNA constructs**

The plasmids for expression of the  $\beta$ -globin-6xMS2 and the control  $\beta$ -globin-GAP mRNAs in human cells were kindly provided by Dr J. Lykke-Andersen and were described previously (Lykke-Andersen *et al*, 2000). The plasmid for expression of the R-Luc-5BoxB-poly(A) reporter in human cells was kindly provided by Dr W. Filipowicz and was described previously (Pillai *et al*, 2004). The reporter containing the MALAT1 3'-end was generated as described in Bhandari *et al*, 2014. All constructs were fully sequenced to confirm the presence of the mutations and the absence of additional mutations. Protein mutants used in this study are listed in Appendix Table S1.

### **Coimmunoprecipitation assays in S2 cells**

The interaction of AGO1 (wild-type or mutants) with endogenous miRNAs and GW182 was tested as described previously (Rehwinkel *et al*, 2005; Eulalio *et al*, 2008). Briefly,  $2.5 \times 10^6$  cells were seeded per well in 6-well plates and transfected with 1.5  $\mu$ g HA-tagged proteins (MBP and AGO1 wild-type or mutants). Three days after transfection, the cells from 8 wells were pooled and resuspended in 2 ml of NET buffer (50 mM Tris-HCl (pH 7.5), 150 mM NaCl, 1 mM EDTA, 0.1% Triton X-100 and 10% glycerol) supplemented with protease inhibitors (Roche-EDTA free protease-inhibitor cocktail tablet). The cells were lysed by sonication (3 times 30 sec followed by 30 sec on ice) and incubated for 15 min on ice. Cell debris were removed by 15 min centrifugation at 16,000 g at 4°C. Aliquots for western (2.5%) and northern (5%) blot analysis were taken and the remaining cell lysate was incubated with anti-HA antibody (8  $\mu$ g, Covance) for 1 hour at 4°C. Next, protein G-Sepharose beads

(GammaBind G-Sepharose, GE Healthcare) were added to the lysate (100  $\mu$ l of a 50% slurry) and incubated for an additional hour. Beads were washed three times with NET buffer. An aliquot of beads (20%) was directly resuspended in SDS-PAGE sample buffer for western blot analysis. The remaining beads were resuspended in 200  $\mu$ l of buffer containing 50 mM Tris-HCl (pH 8.0), 300 mM NaCl, 5 mM EDTA pH 8.0 and 0.5% SDS and treated with proteinase K (1.5 mg/ml) for 2.5 hours at 50°C. RNA isolation and analysis was performed as described by Rehwinkel et al, 2005. miR-2a and tRNA<sup>Ala</sup> were detected using radioactively labeled antisense oligonucleotide probes (miR-2a: GCTCATCAAAGCTGGCTGTGATA, tRNA<sup>Ala</sup>: CTCACATGCTAAGCGAGCGCTCTAC).

### **Coimmunoprecipitation assays in HEK293T cells**

To test the interaction of AGO2 (wild-type or mutants) with endogenous miRNAs and GFP-tagged or endogenous TNRC6s, HEK293T cells ( $4 \times 10^6$ /10-cm dish) were seeded one day before transfection using Turbofect (Thermo Scientific). The transfection mixtures contained plasmids expressing  $\lambda$ N-HA tagged MBP (4  $\mu$ g) or AGO2 [either wild-type (9  $\mu$ g) or mutant (12  $\mu$ g)] and 8  $\mu$ g of plasmid expressing GFP-tagged TNRC6s. Cells were harvested 48 hours after transfection. Cells corresponding to 4 dishes were pooled, washed with PBS and lysed on ice for 15 min in 1 ml of NET buffer. Immunoprecipitations were performed as described for S2 cells. The oligonucleotide probes used for detection of miR-16 and tRNA<sup>Ala</sup> were as follows: CGCCAATATTTACGTGCTGCTA (miR-16) and CTCTACCGCTTGAGCTAATTCCCC (tRNA<sup>Ala</sup>).

### **RNA immunoprecipitation in HEK293T cells**

HEK293T cells ( $4 \times 10^6$ /10-cm dish) were seeded 24 hours before transfection with Lipofectamine 2000. The transfection mixtures contained 5  $\mu\text{g}$  of pEGFP-N3-F-Luc transfection control reporter and any one of the following reporters: pCIneo-R-Luc-6xMS2-A<sub>95</sub>-MALAT1 (10  $\mu\text{g}$ ), pCIneo-TISU-R-Luc-6xMS2-MALAT1 (8  $\mu\text{g}$ ), pCIneo-CAA-R-Luc-6xMS2-A<sub>95</sub>-MALAT1 (15  $\mu\text{g}$ ) or pCIneo-CGG-R-Luc-6xMS2-A<sub>95</sub>-MALAT1 (8  $\mu\text{g}$ ). Cells were washed with ice-cold PBS and lysed in 500  $\mu\text{l}$  of NET buffer for 15 min on ice. The cell debris were removed by a 15 min centrifugation at 16,000  $g$  at 4°C. Aliquots (5%) were taken for western and northern blot analysis. The remaining lysate was incubated with 3  $\mu\text{g}$  of anti-eIF4A2 antibody (Abcam, ab31218) for 2 hours at 4°C. Next, protein G-Sepharose beads were added to the lysate (100  $\mu\text{l}$  of a 50% slurry) and incubated for additional 2 hours. After 2 hours incubation, beads were washed 3 times with NET buffer and resuspended in 1 ml NET buffer without detergent. An aliquot (20%) of the bead suspension was directly resuspended in SDS-PAGE sample buffer for western blot analysis. The remaining beads were used for RNA isolation using TriFast (Peqlab Biotechnologies). At this stage, samples were spiked with 4  $\mu\text{g}$  of double stranded RNA. RNA samples were treated with DNase I (Turbo DNA-free kit, Ambion, AM1907). Input and precipitated fractions were analyzed by western and northern blotting. Note that the protein G-Sepharose beads used for RNA immunoprecipitation were preincubated with yeast RNA (250  $\mu\text{g}$  of yeast RNA /100  $\mu\text{l}$  of 50% slurry) and washed with PBS before use.

### **Tethering assays and knockdowns**

For tethering assays in S2 cells, the transfection mixtures contained 0.1  $\mu\text{g}$  of Firefly luciferase reporter plasmid (or 0.3  $\mu\text{g}$  for the reporter containing a 8-nt 5'-UTR), 0.4

$\mu\text{g}$  of *Renilla* luciferase transfection control and 4 ng of plasmids expressing the  $\lambda\text{N}$ -HA tagged proteins. In the experiment described in Fig 2M, the transfection mixtures contained in addition 0.95  $\mu\text{g}$  of plasmids expressing GFP or GFP-DCP1 GSSG mutant (Chang et al, 2014). For tethering assays in human cells, HEK293T cells ( $0.8 \times 10^6$ /well in six-well plates) were transfected using Lipofectamine 2000 (Life technologies). The transfection mixtures contained 0.25  $\mu\text{g}$  of *Renilla* luciferase reporter plasmids (0.5  $\mu\text{g}$  for the reporters containing the MALAT 3' end), 0.25  $\mu\text{g}$  of the pEGFP-N3-F-Luc transfection control and 0.1–1  $\mu\text{g}$  of plasmids expressing  $\lambda\text{N}$ -HA or HA-MS2 tagged proteins [0.3  $\mu\text{g}$  for TNRC6A-SD and AGO2; 0.1  $\mu\text{g}$  for DDX6 (wild-type or mutant) and 1  $\mu\text{g}$  for NOT1].

In the experiment described in Fig 2N and Fig 5E–G, the transfection mixtures contained 0.5  $\mu\text{g}$  of the control plasmid ( $\beta$ -globin-GAP), 0.5  $\mu\text{g}$  of the plasmid encoding the  $\beta$ -globin-6xMS2, plasmids expressing the MS2-HA tagged proteins (0.2  $\mu\text{g}$  for TNRC6A-SD, 0.1  $\mu\text{g}$  for AGO2 and 2  $\mu\text{g}$  for CNOT1). In Fig 2N, the transfection mixtures contained in addition plasmids expressing HA-tagged DCP2 (either wild-type or catalytically inactive DCP2\* mutant; 1  $\mu\text{g}$ ). Me31B knockdowns in S2 cells and DDX6 depletion in HeLa cells were performed as described previously (Eulalio *et al*, 2007; Chen *et al*, 2014).

### **Polysome profiling in HEK293T cells**

HEK293T cells ( $9 \times 10^6$ /15-cm dish) were seeded one day before transfection with Lipofectamine 2000 (Life Technologies). The transfection mixtures contained 20  $\mu\text{g}$  of the R-Luc-6xMS2-(A)<sub>96</sub>-MALAT1 reporter, 4  $\mu\text{g}$  of the pEGFP-N3-F-Luc transfection control and 6  $\mu\text{g}$  of a plasmids expressing MS2-HA or MS2-HA-DDX6. Cells were treated with cycloheximide 48 hrs after transfection at a final

concentration of 50 µg/ml for 30 min. Cells were washed once with ice-cold PBS (containing 50 µg/ml cycloheximide), and lysed in 300 µl of ice-cold buffer containing 10 mM Tris-HCl (pH 7.4), 10 mM NaCl, 1.5 mM MgCl<sub>2</sub>, 0.5% Triton X-100, 2 mM DTT, 1 U/µl RiboLock RNase inhibitor, 0.5% Na-deoxycholate and 50 µg/ml cyclohexamide for 10 min on ice. The cell debris were removed by a 10 min centrifugation at 10,000 g at 4°C. The supernatants were layered on top of a linear 10–50% (w/v) sucrose gradient (prepared using Gradient Master 107ip Biocomp) in 10 mM Tris-HCl (pH 7.4), 75 mM KCl, 1.5 mM MgCl<sub>2</sub>, and 50g/ml cycloheximide. Centrifugation was carried out in a Beckmann, SV55Ti rotor at 41,000 r.p.m. for 2 hours at 4°C.

Fractions were collected using a density-gradient fractionation system (Teledyne Isco), and polysome profiles were monitored by absorbance of light at 254 nm. Fractions were spiked with 10 µg of double-stranded RNA and treated with proteinase K (0.1 mg/ml, in 10 mM Tris-HCl (pH 8.0), 5 mM EDTA, 0.5% SDS) for 30 min at 42°C. Total RNA was isolated by two rounds of phenol:chloroform extraction followed by one chloroform extraction. RNA samples were treated with DNase I and analyzed by northern blotting.

### **Immunofluorescence in HeLa cells**

Immunostainings of HeLa cells performed as described by Lazzaretti *et al.*, (2009).

### **Knock-down in HeLa cells**

HeLa cells were seeded in 6-well plates and transfected using Lipofectamine 2000 (Life technologies) for luciferase assays. DDX6 knockdowns and complementation assays were performed as described in Chen *et al.*, 2014. Briefly, HeLa cells were

transfected with 4 µg of plasmids expressing control or DDX6 shRNA. One day after transfection, cells were selected in medium containing 1.5 µg/ml puromycin. After twenty-four hours of selection, cells were seeded in 6-well plates in medium without puromycin. Twenty-four hours after reseeding, cells were re-transfected with the transfection mixtures contained 0.8 µg of plasmids expressing the relevant shRNA, 0.5 µg of the R-Luc and 0.2 µg of the F-Luc control reporter together with λN-HA-tagged proteins as indicated in the figure. 72 hours after the second transfection, cells were harvested and luciferase activities were measured.

### **5' RACE**

RNA samples were harvested from HEK293T or S2 cells expressing the indicated reporters. 5' RACE was performed according to manufacturer's protocol (Clontech, SMARTer<sup>TM</sup> RACE cDNA Amplification Kit) using the universal primer and R-Luc (ggaaggttcagcagctcgaaccaagcggtaggtac) or F-Luc (gataaataacgcgcccaacaccgggttaaagaattgaagagagtttc) reverse primers. The 5' RACE products were run on an a 1% agarose gel, visualized by ethidium bromide staining and purified using the QIAquick Gel Extraction kit (Qiagen). A fraction of the purified cDNA was sent directly for sequencing, whereas another fraction was cloned in the TOPO cloning vector using the TOPO-TA cloning kit (Thermo Fischer Scientific). After transformation of *E. coli*, DNA plasmids were isolated from single colonies and send for sequencing.

## Appendix References

Bhandari D, Raisch T, Weichenrieder O, Jonas S, Izaurralde E (2014) Structural basis for the Nanos-mediated recruitment of the CCR4-NOT complex and translational repression. *Genes Dev* 28: 888 – 901

Cope CL, Gilley R, Balmanno K, Sale MJ, Howarth KD, Hampson M, Smith PD, Guichard SM, Cook SJ (2014) Adaptation to mTOR kinase inhibitors by amplification of eIF4E to maintain cap-dependent translation. *J Cell Sci* 127: 788 – 800

Lykke-Andersen J, Shu MD, Steitz JA (2000) Human Upf proteins target an mRNA for nonsense-mediated decay when bound downstream of a termination codon. *Cell* 103: 1121 – 1131

Miyoshi K, Okada TN, Siomi H, Siomi MC (2009) Characterization of the miRNA-RISC loading complex and miRNA-RISC formed in the Drosophila miRNA pathway. *RNA* 15: 1282 – 1291

Okamura K, Ishizuka A, Siomi H, Siomi MC (2004) Distinct roles for Argonaute proteins in small RNA-directed RNA cleavage pathways. *Genes Dev* 18: 1655 – 1666
