# Supplementary figures and images for: miRISC and the CCR4–NOT complex silence mRNA targets independently of 43S ribosomal scanning
Source: PubMed Central journal article supplement — EMBO J. 2016 Mar 24;35(11):1186–203. doi: 10.15252/embj.201592901 (PMC4888236; doi:10.15252/embj.201592901), 2016-03-24

Kuzuoglu-Öztürk et al. Fig. 1 Source Data

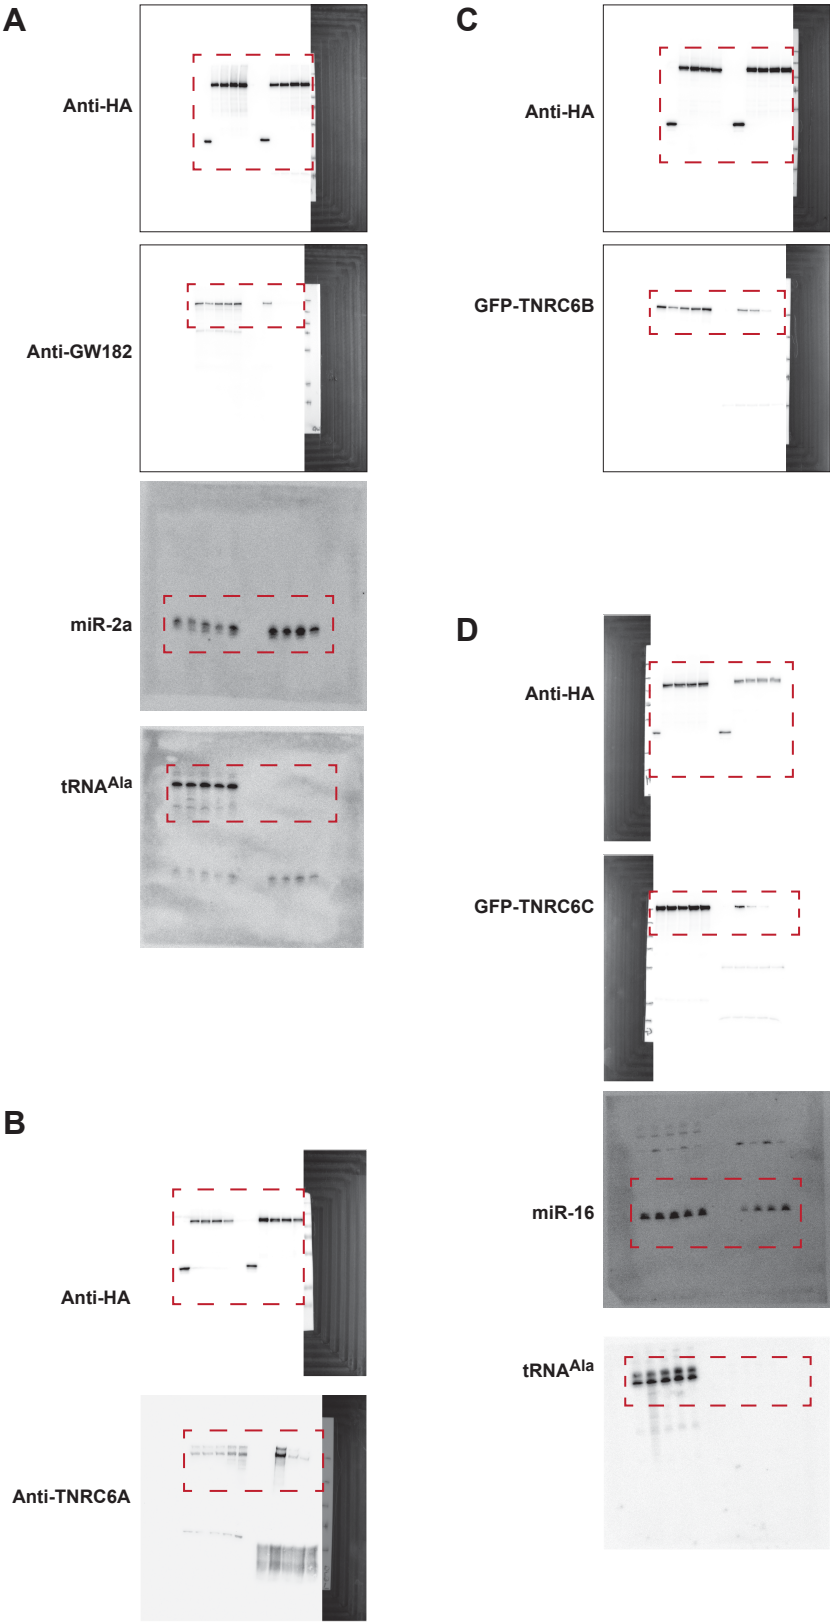

Supplement: EMBJ-35-1186-s003.pdf [file EMBJ-35-1186-s003.pdf]

# Kuzuoglu-Öztürk et al. Fig. 2 Source Data

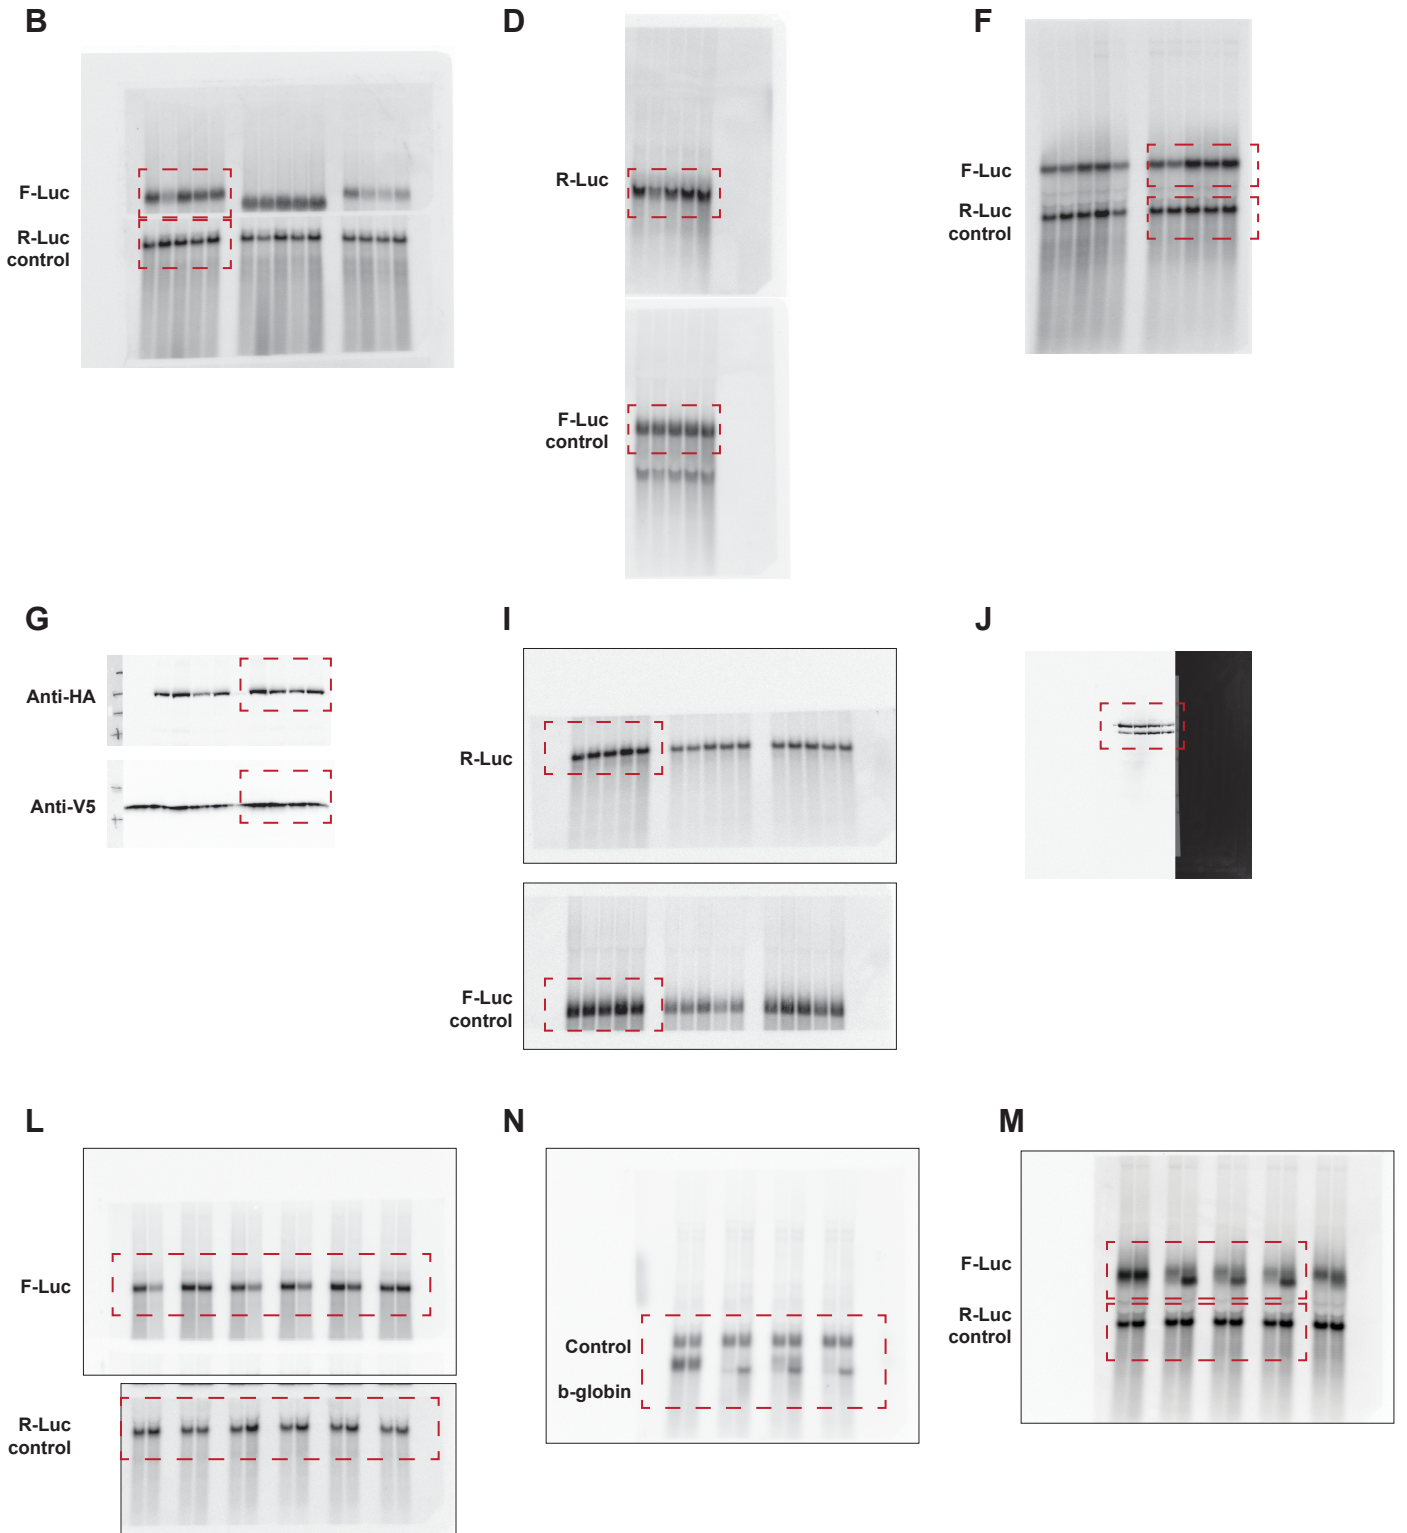

Supplement: EMBJ-35-1186-s004.pdf [file EMBJ-35-1186-s004.pdf]

Kuzuoglu-Öztürk et al. Fig. 3 Source Data

C

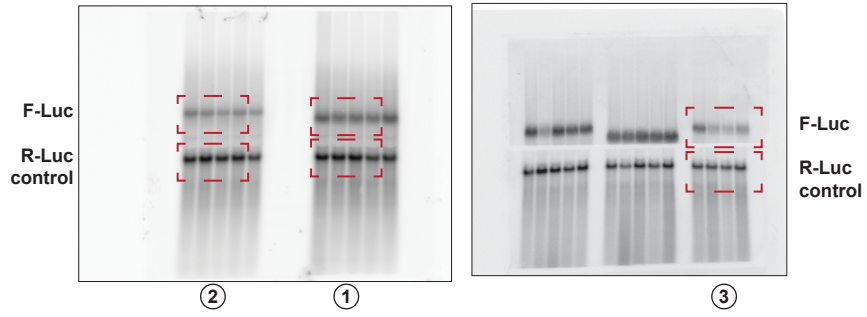

H

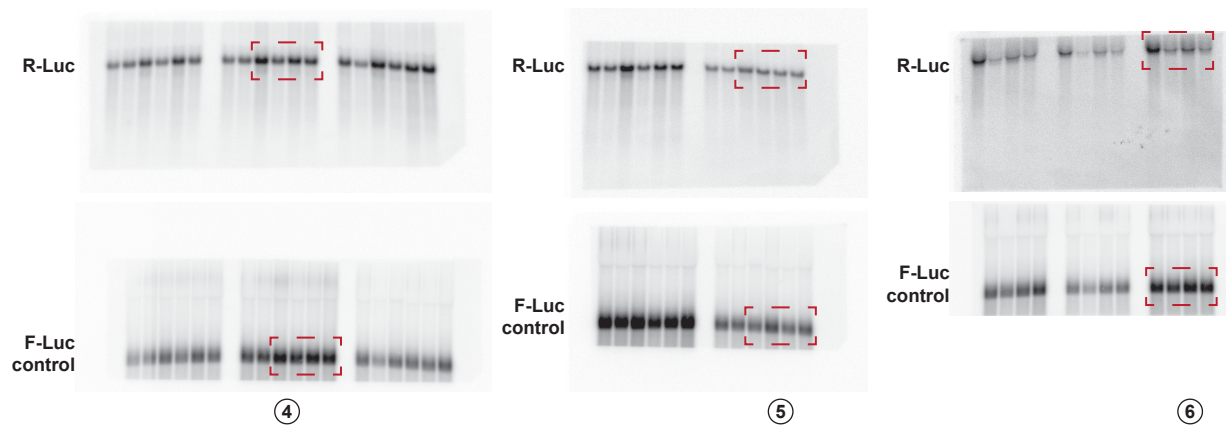

Supplement: EMBJ-35-1186-s005.pdf [file EMBJ-35-1186-s005.pdf]

Kuzuoglu-Öztürk et al. Fig. 4 Source Data

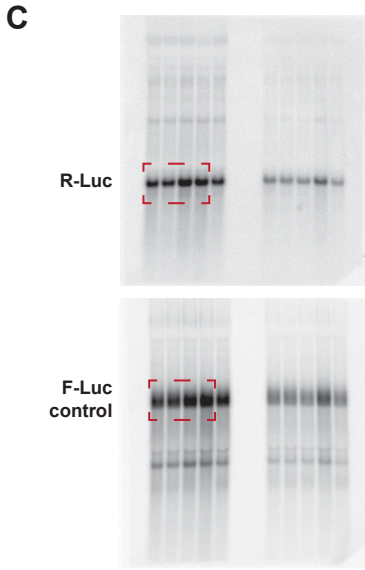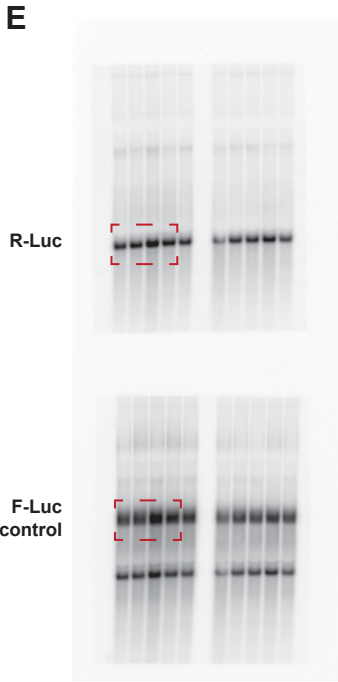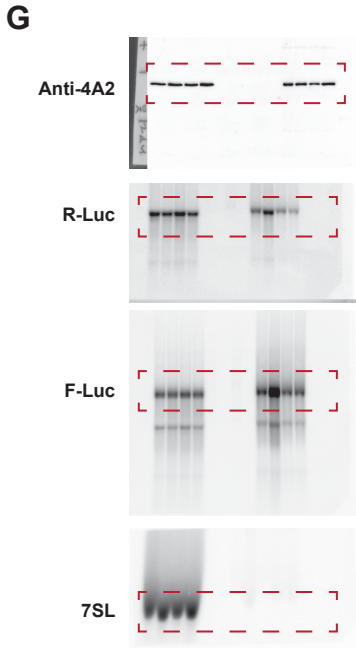

Supplement: EMBJ-35-1186-s006.pdf [file EMBJ-35-1186-s006.pdf]

Kuzuoglu-Öztürk et al. Fig. 5 Source Data

**B**

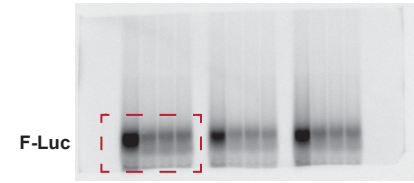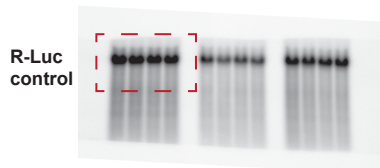

**D**

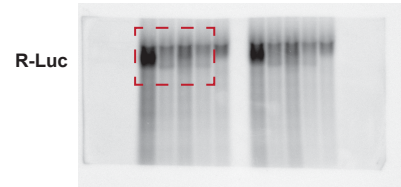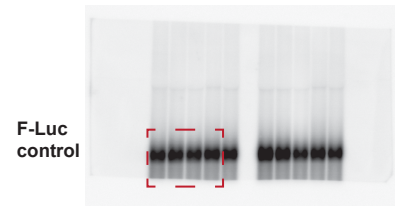

**F**

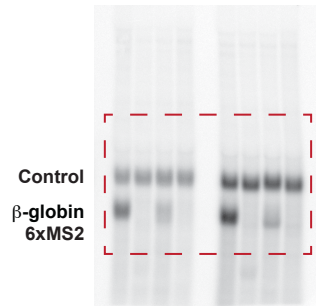

Supplement: EMBJ-35-1186-s007.pdf [file EMBJ-35-1186-s007.pdf]

Kuzuoglu-Öztürk et al. Fig. 6 Source Data

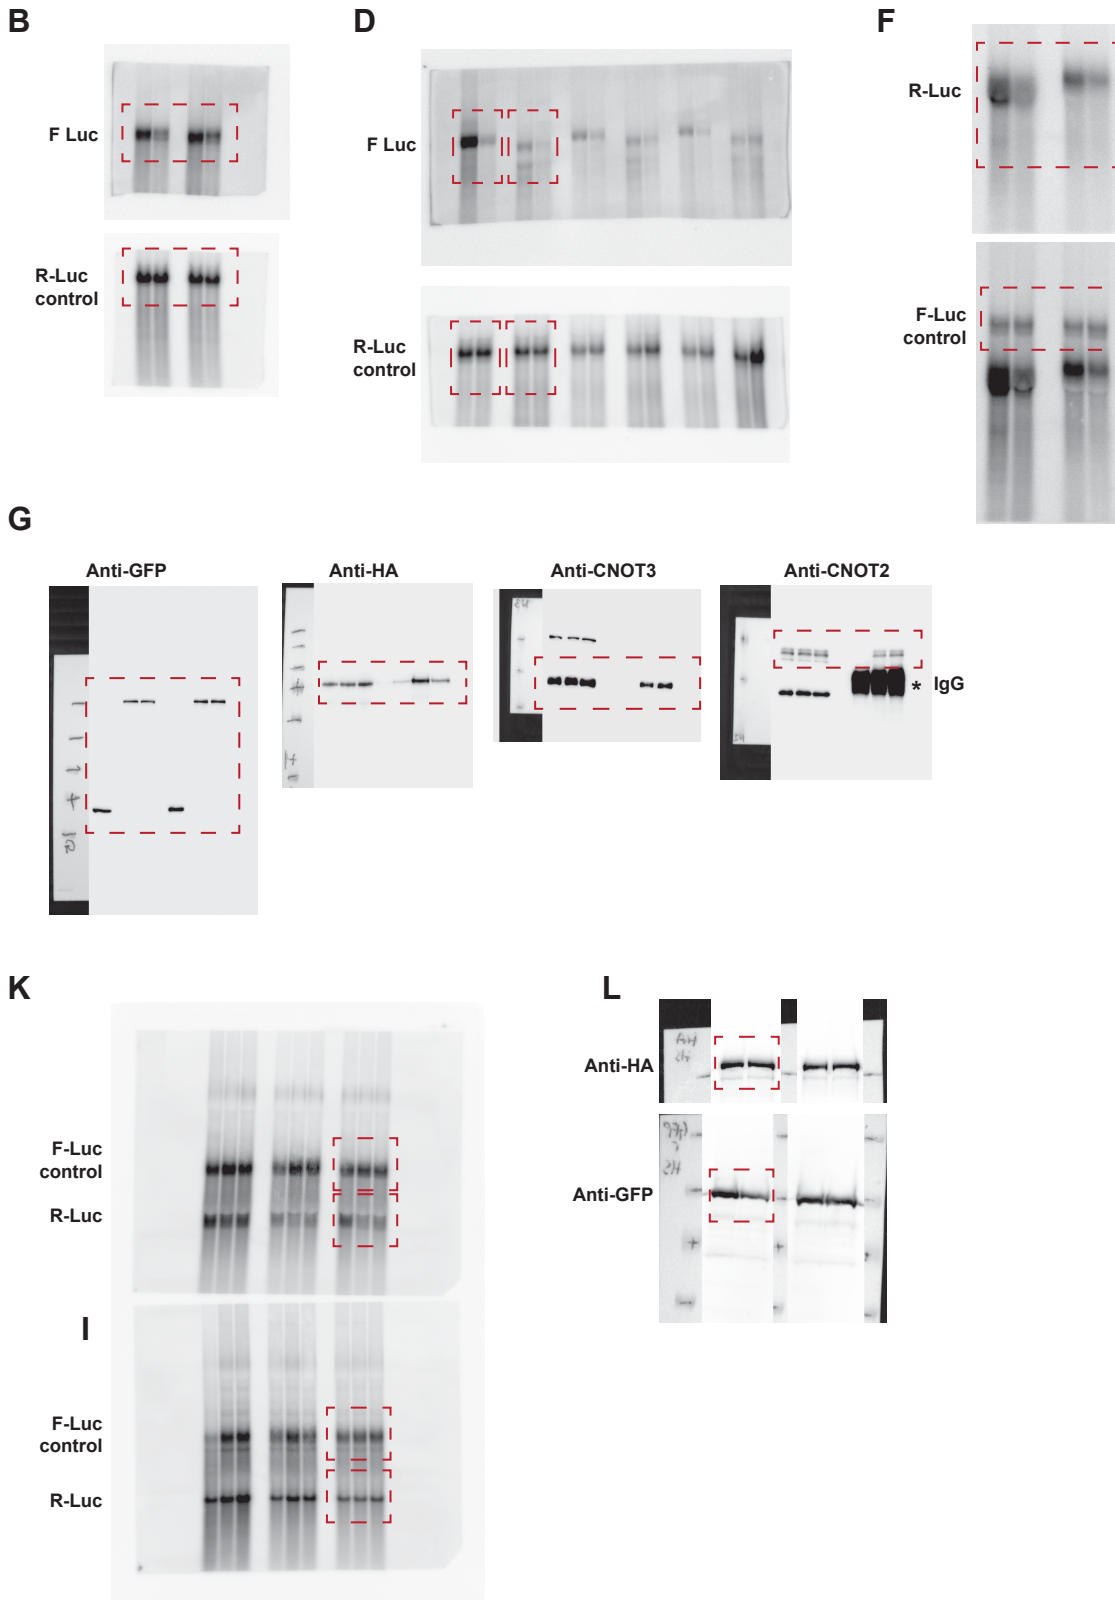

Supplement: EMBJ-35-1186-s008.pdf [file EMBJ-35-1186-s008.pdf]

Kuzuoglu-Öztürk et al. Fig. 7 Source Data

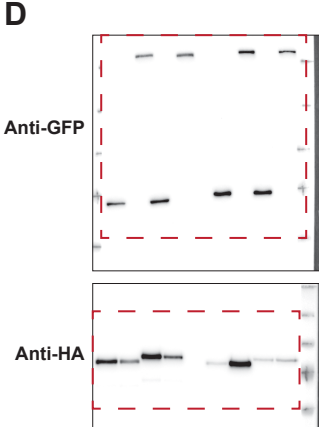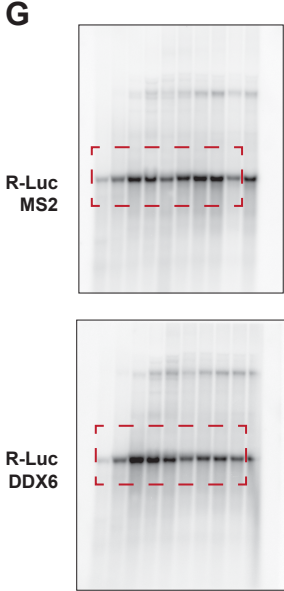

Supplement: EMBJ-35-1186-s009.pdf [file EMBJ-35-1186-s009.pdf]

Kuzuoglu-Öztürk et al. Fig. 8 Source Data

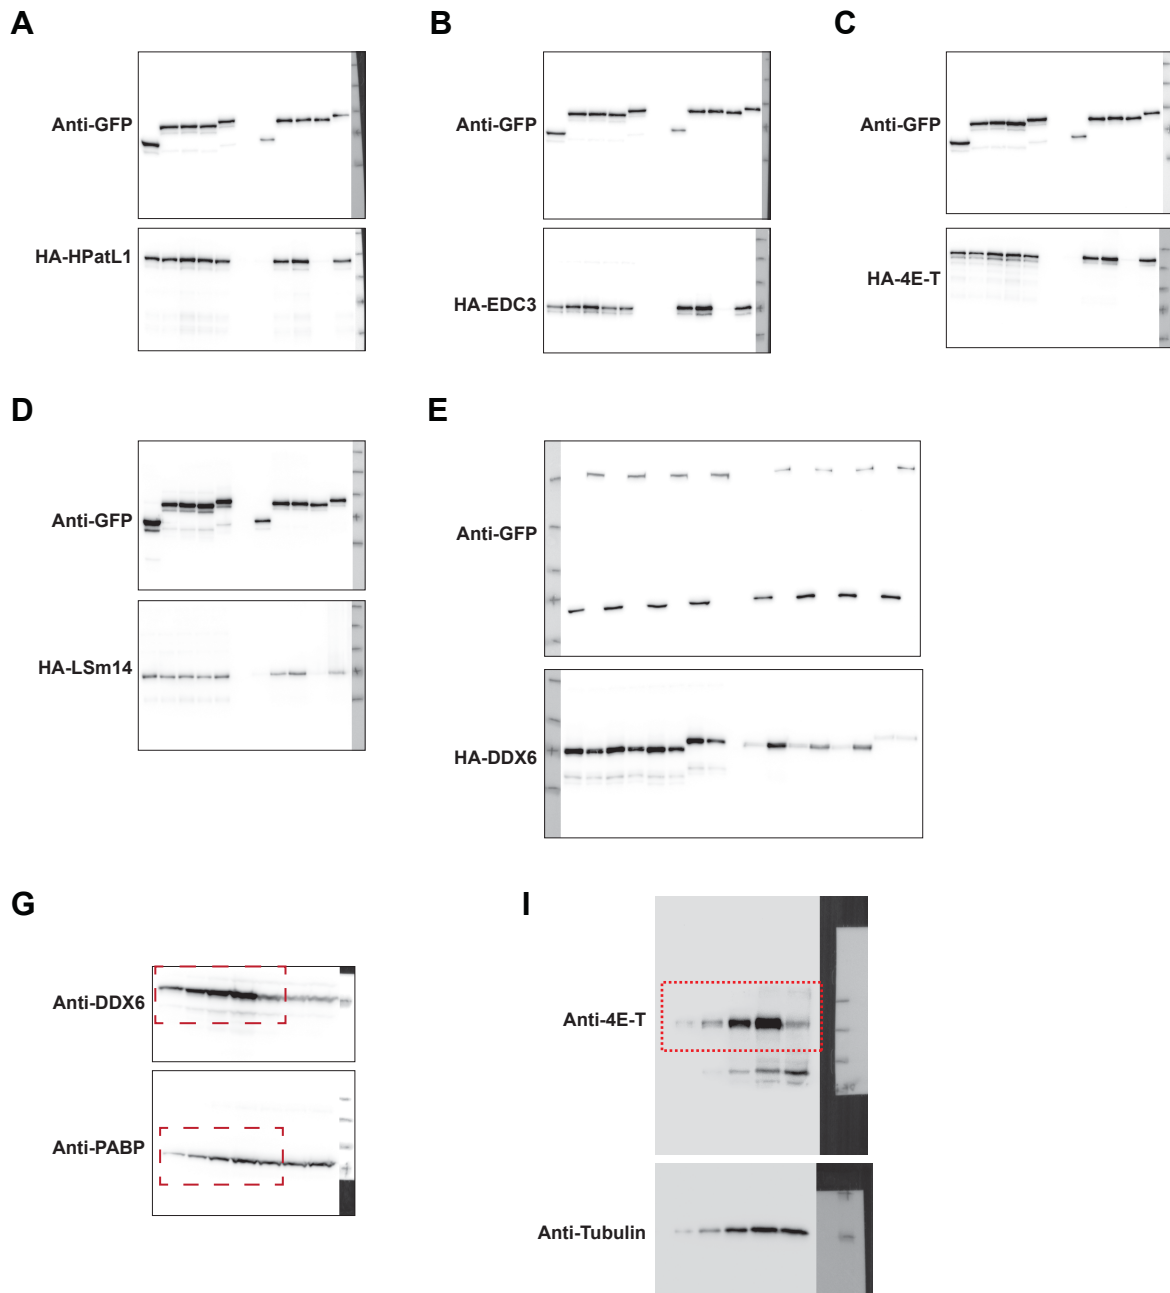

Supplement: EMBJ-35-1186-s010.pdf [file EMBJ-35-1186-s010.pdf]
